# Supplementary material
Source: publisher site journal article supplement (https://www.dovepress.com/article/250659)
Supplement: Supplementary file 1 [file get_supplementary_file.php]

| **Table S1. ICD-9-CM codes and the diseases in this study** | |
| --- | --- |
|  | **ICD-9-CM codes** |
| **Diagnoses excluded** |  |
| Kidney disease | 580-589 |
| Liver disease | 570-573 |
| Hepatoma | 155.0 |
| **Types of dementia** |  |
| Overall dementia | 290.0, 290.10-290.13, 290.20-290.21, 290.3. 290.40-290.43, 290.8-290.9, 331.0 |
| Alzheimer's disease | 331.0 |
| Vascular dementia | 290.4 |
| Other degenerative dementia | 290.x except 290.4 |
| **Comorbidities** |  |
| Diabetes mellitus | 250 |
| Hypertension | 401.1, 401.9, 402.10, 402.90, 404.10, 404.90, 405.1, 405.9 |
| Hyperlipidemia | 272 |
| Obesity | 278 |
| Chronic kidney disease | 274.1, 403-404, 440.1, 442.1, 447.3, 572.4, 580-589, 642.1, 646.2, 753 |
| Atrial fibrillation | 427.31 |
| Cerebrovascular accident | 430-438 |
| **Common indications of the usage of HMCAA** |  |
| Hepatitis | 571.1, 571.4 |
| Urinary tract infection | 599 |
| Dysuria | 788.1 |
| Urolithiasis | 592.9 |
| Vaginitis | 616 |
| Scrotum swelling | 608.89 |
| Inguinal hernia | 550 |
| Dysmenorrhea | 625.3 |
| Oral ulcer | 528.2 |
| Upper respiratory tract infection | 465.9 |
| Bronchitis | 466, 491 |
| Pneumonia | 480-488 |
| Cough | 786.2 |
| Allergy | 995.3 |
| Eczema | 626.9 |
| Headache | 339 |
| Arthralgia | 719.4 |
| Pain | 338 |
| Neuralgia | 729.2 |
| Heart failure | 428 |
| Edema | 782.3 |

**ICD-9-CM = International Classification of Diseases, Ninth Revision, Clinical Modification; HMCAA= Herbal drugs containing aristolochic acids**

| **Table S2. Factors of dementia by using Cox regression model** | | | | | | | | | |
| --- | --- | --- | --- | --- | --- | --- | --- | --- | --- |
|  | **No competing risk in the model** | | | | | | | | |
| **Variables** | **Crude HR** | **95% CI** | **95% CI** | ***P*** |  | **Adjusted HR** | **95% CI** | **95% CI** | ***P*** |
| **HMAAC** (reference: without) | 0.991 | 0.607 | 1.752 | 0.909 |  | 0.929 | 0.528 | 1.634 | 0.797 |
| **Male** (reference: female) | 1.114 | 0.707 | 1.754 | 0.642 |  | 1.180 | 0.705 | 1.975 | 0.529 |
| **Age 55-64** (reference: Age 50-54) | 0.844 | 0.401 | 1.766 | 0.655 |  | 0.813 | 0.354 | 1.672 | 0.801 |
| **Age 65-74** (reference: Age 50-54) | 1.162 | 0.588 | 2.295 | 0.666 |  | 1.010 | 0.572 | 2.181 | 0.679 |
| **Age 75-84** (reference: Age 50-54) | 1.923 | 0.786 | 4.000 | 0.152 |  | 1.824 | 0.774 | 3.801 | 0.243 |
| **Age≧85** (reference: Age 50-54) | 9.184 | 1.917 | 44.002 | 0.006 |  | 8.996 | 1.813 | 31.020 | 0.001 |
| **Insurance premium (NT$)18,000-34,999** (reference: <18,000) | 0.799 | 0.111 | 5.760 | 0.824 |  | 0.621 | 0.076 | 5.099 | 0.657 |
| **Insurance premium (NT$)≧35,000**(reference: <18,000) | 0.000 | - | - | 0.974 |  | 0.000 | - | - | 0.990 |
| **Diabetes mellitus** (reference: without) | 0.964 | 0.567 | 1.638 | 0.891 |  | 1.040 | 0.532 | 1.661 | 0.832 |
| **Hypertension** (reference: without) | 0.857 | 0.528 | 1.391 | 0.533 |  | 0.535 | 0.303 | 1.045 | 0.061 |
| **Hyperlipidemia** (reference: without) | 0.734 | 0.180 | 2.996 | 0.666 |  | 0.652 | 0.145 | 2.926 | 0.576 |
| **Atrial fibrillation** (reference: without) | 0.605 | 0.148 | 2.468 | 0.484 |  | 0.607 | 0.143 | 2.574 | 0.498 |
| **Cerebrovascular accidents** (reference: without) | 5.098 | 3.217 | 8.078 | <0.001 |  | 6.157 | 3.563 | 10.640 | <0.001 |
| **Urinary tract infection** (reference: without) | 2.263 | 1.344 | 3.810 | 0.002 |  | 1.731 | 0.958 | 3.131 | 0.069 |
| **Upper respiratory tract infection** (reference: without) | 0.000 | - | - | 0.990 |  | 0.000 | - | - | 0.992 |
| **Bronchitis** (reference: without) | 1.212 | 0.382 | 3.848 | 0.745 |  | 1.557 | 0.433 | 5.599 | 0.498 |
| **Pneumonia** (reference: without) | 0.514 | 0.223 | 1.186 | 0.119 |  | 1.164 | 0.949 | 1.693 | 0.072 |
| **Heart failure** (reference: without) | 0.160 | 0.022 | 1.153 | 0.069 |  | 0.128 | 0.017 | 0.968 | 0.046 |
| **CCI_R 1** (reference: CCI_R 0) | 0.786 | 0.247 | 2.504 | 0.684 |  | 0.766 | 0.226 | 2.596 | 0.669 |
| **CCI_R 2** (reference: CCI_R 0) | 1.292 | 0.749 | 4.607 | 0.161 |  | 1.161 | 0.321 | 4.204 | 0.820 |
| **CCI_R 3** (reference: CCI_R 0) | 1.118 | 0.249 | 1.538 | 0.301 |  | 1.032 | 0.137 | 1.118 | 0.084 |
| **CCI_R≧4** (reference: CCI_R 0) | 0.213 | 0.030 | 1.537 | 0.125 |  | 0.224 | 0.030 | 1.661 | 0.143 |
| **Summer** (reference: Spring) | 0.629 | 0.307 | 1.288 | 0.205 |  | 0.788 | 0.376 | 1.655 | 0.530 |
| **Autumn** (reference: Spring) | 0.746 | 0.382 | 1.456 | 0.390 |  | 0.972 | 0.478 | 1.974 | 0.936 |
| **Winter** (reference: Spring) | 1.643 | 0.864 | 3.011 | 0.134 |  | 1.990 | 1.032 | 3.835 | 0.040 |
| **Urbanization level 1** (reference: Urbanization level 4) | 1.178 | 0.611 | 2.269 | 0.625 |  | 1.657 | 0.755 | 3.636 | 0.207 |
| **Urbanization level 2** (reference: Urbanization level 4) | 1.158 | 0.621 | 2.161 | 0.645 |  | 1.235 | 0.624 | 2.445 | 0.544 |
| **Urbanization level 3** (reference: Urbanization level 4) | 0.588 | 0.133 | 2.588 | 0.482 |  | 0.488 | 0.106 | 2.247 | 0.357 |
| **Medical center** (reference: Local hospital) | 0.543 | 0.306 | 0.966 | 0.038 |  | 0.613 | 0.291 | 1.292 | 0.198 |
| **Regional hospital** (reference: Local hospital) | 0.579 | 0.339 | 0.989 | 0.045 |  | 0.547 | 0.299 | 0.999 | 0.050 |
| HMAAC: herbal medicine containing aristolochic acid; Adjusted HR = Adjusted Hazard ratio: Adjusted for the variables listed in Table 1.; CI = confidence interval  Interaction term (Age × HMAAC): *P* = 0.019 | | | | | | | | | |

| **Table S3. Factors of dementia subgroup and sensitivity test by using Cox regression and Fine & Gray’s analysis** | | | | | | | | | | | | | | | |
| --- | --- | --- | --- | --- | --- | --- | --- | --- | --- | --- | --- | --- | --- | --- | --- |
|  | **With HMAAC** | |  | **Without HMAAC** | |  | **No competing risk in the model** | | | |  | **Competing risk in the model** | | | |
|  | **Events** | **Rate (per 105 PYs)** |  | **Events** | **Rate (per 105 PYs)** |  | **Adjusted SHR** | **95% CI** | **95% CI** | ***P*** |  | **Adjusted SHR** | **95% CI** | **95% CI** | ***P*** |
| **Overall dementia** | 18 | 674.29 |  | 57 | 706.82 |  | 0.929 | 0.528 | 1.634 | 0.797 |  | 0.861 | 0.484 | 1.532 | 0.611 |
| AD | 2 (11.11%) | 74.92 |  | 2 (3.51%) | 24.80 |  | 2.942 | 0.926 | 5.174 | 0.275 |  | 2.601 | 0.911 | 4.851 | 0.189 |
| VaD | 2 (11.11%) | 74.92 |  | 9 (15.79%) | 111.60 |  | 0.654 | 0.311 | 1.152 | 0.892 |  | 0.606 | 0.302 | 1.078 | 0.772 |
| Other dementia | 14 (77.78%) | 524.45 |  | 46 (80.70%) | 570.41 |  | 0.895 | 0.507 | 1.545 | 0.433 |  | 0.834 | 0.468 | 1.453 | 0.420 |
| HMAAC = herbal medicine containing aristolochic acids; PYs = person-years; Adjusted SHR = Adjusted subdistribution Hazard ratio: Adjusted for the variables listed in Table 1.; AD = Alzheimer dementia; VaD = vascular dementia | | | | | | | | | | | | | | | |

**Table S4. Mortality age of study**

| **HMAAC** | **n** | **Mean ± SD** | **Median** | **Range (min – max)** |
| --- | --- | --- | --- | --- |
| **With** | 35 | 75.99 ± 7.72 | 78.00 | 57.47 – 86.25 |
| **Without** | 124 | 76.37 ± 9.55 | 76.82 | 52.17 – 96.00 |

Top 3 leading cause of mortality in HMAAC group (n, %) were acute respiratory failure (4, 11.43%), septicemia (2, 5.71%), and pneumonia (2, 5.71%).

Top 3 leading cause of mortality in non-HMAAC group (n, %) were acute respiratory failure (12, 9.68%), pneumonia (9, 7.26%), and septicemia (8, 6.45%)

**Table S5. Sensitivity test for factors of dementia by using Cox regression and Fine & Gray's competing risk model**

| **HMAAC (reference: without)** | **Non-competing risk in the model** | | | | **Competing risk in the model** | | | |
| --- | --- | --- | --- | --- | --- | --- | --- | --- |
| **Sensitivity test** | **Adjusted HR** | **95% CI** | **95% CI** | ***P*** | **Adjusted HR** | **95% CI** | **95% CI** | ***P*** |
| Overall | 0.929 | 0.528 | 1.634 | 0.797 | 0.861 | 0.484 | 1.532 | 0.611 |
| In the first 1 year excluded | 0.914 | 0.501 | 1.507 | 0.808 | 0.836 | 0.445 | 1.481 | 0.754 |
| In the first 2 years excluded | 0.811 | 0.462 | 1.434 | 0.826 | 0.752 | 0.339 | 1.349 | 0.783 |
| In the first 5 years excluded | 0.876 | 0.512 | 1.582 | 0.811 | 0.815 | 0.424 | 1.451 | 0.803 |

HMAAC: herbal medicine containing aristolochic acid; Adjusted HR = Adjusted Hazard ratio: Adjusted for the variables listed in Table 1.; CI = confidence interval

| **Table S6. Subgroup analysis for factors of dementia using Cox regression and Fine & Gray's competing risk model** | | | | | | | | | |
| --- | --- | --- | --- | --- | --- | --- | --- | --- | --- |
| **HMAAC** (Reference: Without) | **No competing risk in the model** | | | |  | **Competing risk in the model** | | | |
| **Stratified** | **Adjusted HR** | **95% CI** | **95% CI** | ***P*** |  | **Adjusted SHR** | **95% CI** | **95% CI** | ***P*** |
| **Total** | 0.929 | 0.528 | 1.634 | 0.797 |  | 0.861 | 0.484 | 1.532 | 0.611 |
| **Male** | 1.113 | 0.632 | 1.959 | 0.726 |  | 1.032 | 0.589 | 1.832 | 0.611 |
| **Female** | 0.788 | 0.448 | 1.387 | 0.801 |  | 0.730 | 0.412 | 1.298 | 0.703 |
| **Age 50-54** | 0.000 | - | - | 0.986 |  | 0.000 | - | - | 0.972 |
| **Age 55-64** | 0.613 | 0.340 | 1.072 | 0.197 |  | 0.568 | 0.311 | 1.012 | 0.188 |
| **Age 65-74** | 0.629 | 0.351 | 1.106 | 0.284 |  | 0.583 | 0.326 | 1.036 | 0.243 |
| **Age 75-84** | 0.841 | 0.473 | 1.489 | 0.452 |  | 0.779 | 0.437 | 1.384 | 0.426 |
| **Age≧85** | 1.212 | 0.689 | 2.134 | 0.803 |  | 1.120 | 0.631 | 1.999 | 0.801 |
| **Insured premium (NT$<18,000)** | 0.950 | 0.543 | 1.682 | 0.733 |  | 0.888 | 0.498 | 1.531 | 0.702 |
| **Insured premium (NT$18,000-34,999)** | ∞ | - | - | 0.892 |  | ∞ | - | - | 0.806 |
| **Insured premium (NT$≧35,000)** | - | - | - | - |  | - | - | - | - |
| **Without diabetes mellitus** | 0.873 | 0.411 | 1.538 | 0.831 |  | 0.809 | 0.402 | 1.440 | 0.714 |
| **With diabetes mellitus** | 1.115 | 0.659 | 1.962 | 0.711 |  | 1.030 | 0.581 | 1.843 | 0.652 |
| **Without hypertension** | 0.965 | 0.543 | 1.690 | 0.812 |  | 0.895 | 0.503 | 1.536 | 0.808 |
| **With hypertension** | 0.840 | 0.472 | 1.484 | 0.564 |  | 0.781 | 0.439 | 1.390 | 0.422 |
| **Without hyperlipidemia** | 0.942 | 0.523 | 1.670 | 0.732 |  | 0.879 | 0.494 | 1.563 | 0.700 |
| **With hyperlipidemia** | 0.000 | - | - | 0.998 |  | 0.000 | - | - | 0.998 |
| **Without chronic kidney disease** | 0.872 | 0.495 | 1.533 | 0.261 |  | 0.808 | 0.454 | 1.435 | 0.254 |
| **With chronic kidney disease** | 1.763 | 1.010 | 3.101 | 0.040 |  | 1.635 | 1.002 | 2.907 | 0.048 |
| **Without atrial fibrillation** | 0.957 | 0.541 | 1.683 | 0.894 |  | 0.887 | 0.498 | 1.577 | 0.821 |
| **With atrial fibrillation** | 0.000 | - | - | 0.986 |  | 0.000 | - | - | 0.983 |
| **Without cerebral vascular disease** | 0.675 | 0.385 | 1.189 | 0.478 |  | 0.625 | 0.351 | 1.112 | 0.310 |
| **With cerebral vascular disease** | 1.128 | 0.640 | 1.987 | 0.769 |  | 1.047 | 0.588 | 1.826 | 0.723 |
| **Without urinary tract infections** | 0.845 | 0.482 | 1.497 | 0.774 |  | 0.783 | 0.435 | 1.392 | 0.704 |
| **With urinary tract infections** | 1.541 | 0.876 | 2.727 | 0.673 |  | 1.421 | 0.803 | 2.437 | 0.612 |
| **Without bronchitis** | 0.828 | 0.472 | 1.497 | 0.898 |  | 0.768 | 0.421 | 1.364 | 0.818 |
| **With bronchitis** | 8.701 | 3.429 | 11.121 | <0.001 |  | 7.080 | 2.461 | 9.651 | <0.001 |
| **Without pneumonia** | 0.873 | 0.496 | 1.542 | 0.770 |  | 0.812 | 0.423 | 1.432 | 0.597 |
| **With pneumonia** | 1.599 | 0.909 | 2.823 | 0.896 |  | 1.483 | 0.834 | 2.602 | 0.813 |
| **Without heart failure** | 0.943 | 0.536 | 1.658 | 0.892 |  | 0.874 | 0.494 | 1.555 | 0.811 |
| **With heart failure** | 0.000 | - | - | 0.996 |  | 0.000 | - | - | 0.996 |
| **CCI_R = 0** | 0.897 | 0.512 | 1.573 | 0.562 |  | 0.831 | 0.467 | 1.495 | 0.523 |
| **CCI_R = 1** | 0.000 | - | - | 0.986 |  | - | - | - | 0.982 |
| **CCI_R = 2** | 3.454 | 1.097 | 5.426 | 0.021 |  | 2.812 | 1.042 | 5.150 | 0.020 |
| **CCI_R = 3** | 1.208 | 0.684 | 2.164 | 0.483 |  | 1.199 | 0.683 | 1.999 | 0.482 |
| **CCI_R≧4** | 0.000 | - | - | 0.977 |  | 0.000 | - | - | 0.974 |
| **Spring** | 0.989 | 0.560 | 1.723 | 0.562 |  | 0.916 | 0.515 | 1.631 | 0.577 |
| **Summer** | 1.840 | 0.966 | 3.401 | 0.101 |  | 1.803 | 0.914 | 3.209 | 0.103 |
| **Autumn** | 0.866 | 0.492 | 1.529 | 0.342 |  | 0.803 | 0.451 | 1.428 | 0.342 |
| **Winter** | 0.504 | 0.287 | 1.012 | 0.894 |  | 0.470 | 0.266 | 1.006 | 0.813 |
| **Urbanization level 1 (The highest)** | 1.062 | 0.603 | 1.878 | 0.872 |  | 0.986 | 0.544 | 1.756 | 0.871 |
| **Urbanization level 2** | 0.934 | 0.528 | 1.633 | 0.660 |  | 0.862 | 0.482 | 1.535 | 0.652 |
| **Urbanization level 3** | 0.000 | - | - | 0.986 |  | 0.000 | - | - | 0.989 |
| **Urbanization level 4 (The lowest)** | 0.922 | 0.501 | 1.621 | 0.457 |  | 0.855 | 0.480 | 1.531 | 0.433 |
| **Medical center** | 0.935 | 0.512 | 1.649 | 0.801 |  | 0.897 | 0.497 | 1.544 | 0.782 |
| **Regional hospital** | 0.812 | 0.411 | 1.482 | 0.673 |  | 0.752 | 0.423 | 1.342 | 0.503 |
| **Local hospital** | 1.038 | 0.564 | 1.925 | 0.562 |  | 0.962 | 0.541 | 1.779 | 0.489 |
| HMAAC: herbal medicine containing aristolochic acid; Adjusted SHR = Adjusted subdistribution Hazard ratio: Adjusted for the variables listed in Table 1.; CI = confidence interval; NT$ = New Taiwan Dollars  Interaction term (Age × HMAAC): *P* = 0.019 (Non-competing risk in the model), *P* = 0.013 (Competing risk in the model) | | | | | | | | | |

**Table S7. Factors of dementia by using Cox regression and Fine & Gray’s analysis among different model**

| **HMAAC (reference: without)** |  | **Non-competing risk in the model** | | | |  | **Competing risk in the model** | | | |
| --- | --- | --- | --- | --- | --- | --- | --- | --- | --- | --- |
| **Model** |  | **Adjusted HR** | **95% CI** | **95% CI** | ***P*** |  | **Adjusted HR** | **95% CI** | **95% CI** | ***P*** |
| Model 0 |  | 0.991 | 0.607 | 1.752 | 0.909 |  | 0.960 | 0.565 | 1.631 | 0.881 |
| Model 1 |  | 0.984 | 0.600 | 1.746 | 0.903 |  | 0.965 | 0.567 | 1.642 | 0.895 |
| Model 2 |  | 0.972 | 0.594 | 1.740 | 0.884 |  | 0.953 | 0.560 | 1.623 | 0.860 |
| Model 3 |  | 0.970 | 0.586 | 1.722 | 0.867 |  | 0.951 | 0.559 | 1.618 | 0.853 |
| Model 4 |  | 0.939 | 0.552 | 1.683 | 0.845 |  | 0.898 | 0.521 | 1.547 | 0.697 |
| Model 5 |  | 0.933 | 0.531 | 1.669 | 0.802 |  | 0.885 | 0.496 | 1.537 | 0.641 |
| Model 6 |  | 0.929 | 0.528 | 1.634 | 0.797 |  | 0.861 | 0.484 | 1.532 | 0.611 |

HR= hazard ratio; CI = confidence interval

Model 0: unadjusted

Model 1: adjusted for gender, and age

Model 2: adjusted for gender, age, and insurance premium

Model 3: adjusted for gender, age, insurance premium, and CCI_R

Model 4: adjusted for gender, age, insurance premium, CCI_R, and comorbidities

Model 5: adjusted for gender, age, insurance premium, CCI_R, comorbidities and season

Model 6: adjusted for gender, age, insurance premium, CCI_R, comorbidities, season, urbanization level, and level of care
